# Supplementary material for: Identification of fatty acid metabolism-related clusters and immune infiltration features in hepatocellular carcinoma
Source: publisher site journal article supplement (doi:10.18632/aging.204557), 2023-03-06
Supplement: Supplementary file [file aging-v15i5-204557-supplementary-material-SD2.pdf]

## SUPPLEMENTARY TABLES

**Supplementary Table 1. Fatty acid metabolism-related genes.**

| Gene symbol | Description                                                                   | Category       | Relevance score |
|-------------|-------------------------------------------------------------------------------|----------------|-----------------|
| FASN        | Fatty Acid Synthase                                                           | Protein Coding | 88.04946899     |
| FABP2       | Table-S1:Fatty Acid Binding Protein 2                                         | Protein Coding | 80.34545898     |
| LIPA        | Lipase A, Lysosomal Acid Type                                                 | Protein Coding | 79.07958984     |
| INS         | Insulin                                                                       | Protein Coding | 78.31687164     |
| SLC17A5     | Solute Carrier Family 17 Member 5                                             | Protein Coding | 75.35491943     |
| FADS1       | Fatty Acid Desaturase 1                                                       | Protein Coding | 73.69827271     |
| HADHA       | Hydroxyacyl-CoA Dehydrogenase Trifunctional Multienzyme Complex Subunit Alpha | Protein Coding | 73.44226837     |
| FABP4       | Fatty Acid Binding Protein 4                                                  | Protein Coding | 72.57804871     |
| PPARG       | Peroxisome Proliferator Activated Receptor Gamma                              | Protein Coding | 70.81949615     |
| FABP1       | Fatty Acid Binding Protein 1                                                  | Protein Coding | 70.25164032     |
| CPT2        | Carnitine Palmitoyltransferase 2                                              | Protein Coding | 69.19077301     |
| ACADM       | Acyl-CoA Dehydrogenase Medium Chain                                           | Protein Coding | 66.55280304     |
| MTR         | 5-Methyltetrahydrofolate-Homocysteine Methyltransferase                       | Protein Coding | 65.85922241     |
| ALB         | Albumin                                                                       | Protein Coding | 65.84506226     |
| FADS2       | Fatty Acid Desaturase 2                                                       | Protein Coding | 65.0801239      |
| FABP3       | Fatty Acid Binding Protein 3                                                  | Protein Coding | 63.80797577     |
| DDC         | Dopa Decarboxylase                                                            | Protein Coding | 62.60398865     |
| FA2H        | Fatty Acid 2-Hydroxylase                                                      | Protein Coding | 62.45428848     |
| PPARA       | Peroxisome Proliferator Activated Receptor Alpha                              | Protein Coding | 61.77651215     |
| BAAT        | Bile Acid-CoA:Amino Acid N-Acyltransferase                                    | Protein Coding | 61.54239273     |
| CPT1A       | Carnitine Palmitoyltransferase 1A                                             | Protein Coding | 61.52598572     |
| ACADVL      | Acyl-CoA Dehydrogenase Very Long Chain                                        | Protein Coding | 61.33808136     |
| HADHB       | Hydroxyacyl-CoA Dehydrogenase Trifunctional Multienzyme Complex Subunit Beta  | Protein Coding | 60.69838715     |
| MMACHC      | Metabolism Of Cobalamin Associated C                                          | Protein Coding | 60.51202393     |
| ABCD1       | ATP Binding Cassette Subfamily D Member 1                                     | Protein Coding | 60.29699326     |
| LPL         | Lipoprotein Lipase                                                            | Protein Coding | 58.79434204     |
| FABP5       | Fatty Acid Binding Protein 5                                                  | Protein Coding | 57.8329277      |
| FAAH        | Fatty Acid Amide Hydrolase                                                    | Protein Coding | 57.01290512     |
| PNPLA3      | Patatin Like Phospholipase Domain Containing 3                                | Protein Coding | 56.81323242     |
| CYP2D6      | Cytochrome P450 Family 2 Subfamily D Member 6                                 | Protein Coding | 55.99719238     |
| AKR1D1      | Aldo-Keto Reductase Family 1 Member D1                                        | Protein Coding | 54.9125061      |
| CYP2C19     | Cytochrome P450 Family 2 Subfamily C Member 19                                | Protein Coding | 53.54149628     |
| NR1H4       | Nuclear Receptor Subfamily 1 Group H Member 4                                 | Protein Coding | 53.41639328     |
| ACADS       | Acyl-CoA Dehydrogenase Short Chain                                            | Protein Coding | 53.31412506     |
| ACOX1       | Acyl-CoA Oxidase 1                                                            | Protein Coding | 52.61158371     |
| ADIPOQ      | Adiponectin, C1Q And Collagen Domain Containing                               | Protein Coding | 52.42185211     |
| SCD         | Stearoyl-CoA Desaturase                                                       | Protein Coding | 52.2116394      |
| SLC27A1     | Solute Carrier Family 27 Member 1                                             | Protein Coding | 52.18554688     |
| FABP12      | Fatty Acid Binding Protein 12                                                 | Protein Coding | 52.18073273     |
| FABP6       | Fatty Acid Binding Protein 6                                                  | Protein Coding | 52.11978912     |
| CD36        | CD36 Molecule                                                                 | Protein Coding | 52.04457474     |
| LIPC        | Lipase C, Hepatic Type                                                        | Protein Coding | 51.4848938      |
| APOB        | Apolipoprotein B                                                              | Protein Coding | 50.64818192     |

|         |                                               |                |             |
|---------|-----------------------------------------------|----------------|-------------|
| APOE    | Apolipoprotein E                              | Protein Coding | 50.5888176  |
| PHYH    | Phytanoyl-CoA 2-Hydroxylase                   | Protein Coding | 50.57295227 |
| HADH    | Hydroxyacyl-CoA Dehydrogenase                 | Protein Coding | 50.49472809 |
| CYP3A4  | Cytochrome P450 Family 3 Subfamily A Member 4 | Protein Coding | 50.4631424  |
| AMACR   | Alpha-Methylacyl-CoA Racemase                 | Protein Coding | 50.12758636 |
| HSD17B4 | Hydroxysteroid 17-Beta Dehydrogenase 4        | Protein Coding | 50.03477859 |

**Supplementary Table 2. 79 prognostic genes identified by uncox analysis.**

| <b>ID</b>  | <b>HR</b>   | <b>HR.95L</b> | <b>HR.95H</b> | <b>p value</b> |
|------------|-------------|---------------|---------------|----------------|
| CYP3A4     | 0.778076355 | 0.631093988   | 0.95929105    | 0.018822658    |
| RANBP3L    | 0.485929735 | 0.257884755   | 0.915632671   | 0.025573005    |
| SORD       | 0.553252858 | 0.315242258   | 0.970963495   | 0.039146754    |
| SEC14L2    | 0.556356443 | 0.35219986    | 0.878854671   | 0.011952572    |
| AQP9       | 0.677623041 | 0.493691285   | 0.930081205   | 0.016015165    |
| ALAS1      | 0.341885541 | 0.131021095   | 0.892113769   | 0.028289079    |
| ADH1B      | 0.605729859 | 0.438281266   | 0.837153423   | 0.002392409    |
| ECM2       | 0.490288961 | 0.28657424    | 0.838816724   | 0.009282406    |
| PACRG      | 0.489240618 | 0.272397527   | 0.87870248    | 0.016722256    |
| GRHPR      | 0.320862856 | 0.105618949   | 0.97475854    | 0.044956842    |
| APOC4      | 0.564618825 | 0.325778952   | 0.978560512   | 0.041629443    |
| ZNF385B    | 0.599719641 | 0.383262564   | 0.938426242   | 0.025210962    |
| MYRIP      | 0.654531516 | 0.44584435    | 0.960899259   | 0.030497356    |
| UNC119     | 2.406159309 | 1.076484474   | 5.378249999   | 0.032390758    |
| COBLL1     | 0.401391037 | 0.187490206   | 0.859323633   | 0.018756828    |
| CYP3A43    | 0.494188942 | 0.307679981   | 0.79375561    | 0.003553024    |
| ST6GALNAC4 | 4.577439148 | 2.318914107   | 9.035672813   | 1.16456E-05    |
| TMSB10     | 3.52740543  | 1.218053353   | 10.21514291   | 0.020149295    |
| TRNP1      | 2.23135374  | 1.514507558   | 3.287497302   | 4.9203E-05     |
| KCTD17     | 2.14699596  | 1.313742559   | 3.50874806    | 0.002297419    |
| ADI1       | 0.209793466 | 0.067094199   | 0.655992608   | 0.007257318    |
| CD24       | 1.433969982 | 1.041136815   | 1.975023724   | 0.027329796    |
| GTF3C6     | 13.57443192 | 3.603410607   | 51.13633223   | 0.000116072    |
| PAFAH1B3   | 2.512457785 | 1.407123335   | 4.486063136   | 0.001841278    |
| PDK4       | 0.541413324 | 0.326464404   | 0.897887746   | 0.017440487    |
| IKBKE      | 2.254088928 | 1.312611493   | 3.87084596    | 0.003219696    |
| ANKRD13D   | 3.523342088 | 1.528676787   | 8.120709085   | 0.003115166    |
| LRRC1      | 1.808283501 | 1.125661734   | 2.904859535   | 0.014308862    |
| ARPC3      | 10.79177831 | 1.894809774   | 61.4639426    | 0.007361876    |
| GLTP       | 17.37701093 | 3.613247439   | 83.57039306   | 0.000366508    |
| SLC2A6     | 1.715164093 | 1.051338438   | 2.798135939   | 0.030738336    |
| BTNL9      | 0.366002192 | 0.201388798   | 0.665169096   | 0.000975159    |
| OAZ1       | 18.94482761 | 2.560843715   | 140.1516583   | 0.003965072    |
| CIB2       | 1.766576726 | 1.09180951    | 2.858367965   | 0.020464379    |
| SH3BGRL3   | 6.03881903  | 1.808128189   | 20.16855635   | 0.003471103    |

|           |             |             |             |             |
|-----------|-------------|-------------|-------------|-------------|
| NFKBIE    | 2.896363352 | 1.295007694 | 6.477892534 | 0.009613449 |
| GNAZ      | 1.915092976 | 1.255313579 | 2.92164537  | 0.002568985 |
| GRAMD1A   | 2.411861311 | 1.140248758 | 5.101584143 | 0.021259918 |
| PLP2      | 2.429269296 | 1.239697358 | 4.760314505 | 0.009710398 |
| P2RX4     | 3.309419925 | 1.426343897 | 7.678555126 | 0.00532122  |
| BAK1      | 3.838358962 | 1.703445451 | 8.648941187 | 0.001174366 |
| DYNLT1    | 13.36161281 | 3.008589083 | 59.34100404 | 0.000654496 |
| CAPG      | 2.309200988 | 1.383797324 | 3.853461134 | 0.001358784 |
| CCDC149   | 3.732128772 | 1.652195378 | 8.430470968 | 0.001536791 |
| TRAPPC4   | 14.09480342 | 4.075780094 | 48.74244409 | 2.92156E-05 |
| C11orf80  | 2.560164894 | 1.288077049 | 5.088549859 | 0.007312492 |
| SMPD2     | 5.253812801 | 1.795266114 | 15.37518518 | 0.002461619 |
| RGS19     | 3.177490631 | 1.340891369 | 7.529652994 | 0.008630722 |
| ARPC1B    | 4.21079628  | 1.520584487 | 11.66051966 | 0.005667732 |
| S100A6    | 1.83503394  | 1.073343413 | 3.13725274  | 0.026511316 |
| C12orf49  | 2.691628705 | 1.383349689 | 5.237189949 | 0.003551498 |
| PHLDA2    | 2.157304562 | 1.382549384 | 3.366218252 | 0.000706858 |
| EGLN3     | 2.568763817 | 1.705472772 | 3.869043035 | 6.34526E-06 |
| MMP9      | 1.493898792 | 1.071488971 | 2.082833945 | 0.017924239 |
| RNFT2     | 3.528666911 | 1.790133293 | 6.955621806 | 0.000270858 |
| NRM       | 2.327320495 | 1.207843706 | 4.484372159 | 0.011594105 |
| GABARAPL1 | 0.387683107 | 0.17874024  | 0.840874958 | 0.016453825 |
| GLS       | 2.339010916 | 1.280372041 | 4.272954962 | 0.005712296 |
| PDE4A     | 1.807937851 | 1.009799228 | 3.236919955 | 0.046285649 |
| TMEM189   | 6.608824384 | 2.229300737 | 19.59204473 | 0.000659563 |
| ANKRD24   | 0.30219409  | 0.136574227 | 0.668656669 | 0.003144648 |
| TRPM2     | 2.771002254 | 1.427282838 | 5.37977007  | 0.002603816 |
| ABHD12    | 13.09979991 | 2.834703327 | 60.5371137  | 0.000987256 |
| CCDC112   | 3.57319329  | 1.807429626 | 7.064015164 | 0.000250133 |
| ASRGL1    | 2.309893898 | 1.433019387 | 3.723334011 | 0.000588197 |
| RBM38     | 3.92752773  | 1.482062082 | 10.408116   | 0.005937778 |
| CFL1      | 128.1863798 | 14.51617911 | 1131.960955 | 1.25869E-05 |
| DOK1      | 2.09453848  | 1.020148304 | 4.300444777 | 0.043976754 |
| IFI27L2   | 1.761646639 | 1.025608679 | 3.025909339 | 0.040210618 |
| TMED9     | 8.276218821 | 1.054130849 | 64.97845883 | 0.044420152 |
| SAAL1     | 6.133981755 | 1.871604613 | 20.10346197 | 0.002745506 |
| MMD       | 3.088608202 | 1.519324905 | 6.278775918 | 0.001836454 |
| CYB5D2    | 0.179105725 | 0.05980064  | 0.536430053 | 0.002120822 |
| RRM2      | 3.054808696 | 1.703875719 | 5.476840867 | 0.000177522 |
| AKR1D1    | 0.6053703   | 0.414352169 | 0.884448612 | 0.009465756 |
| C16orf45  | 0.50778156  | 0.289491837 | 0.890671447 | 0.018088686 |
| SLC22A1   | 0.623023973 | 0.474713929 | 0.817669016 | 0.000646909 |
| FETUB     | 0.702168912 | 0.515209768 | 0.956971726 | 0.025195346 |
| CD14      | 0.373053627 | 0.139944271 | 0.994460202 | 0.048716011 |

**Supplementary Table 3. The regression coefficient of five candidate genes.**

| <b>ID</b> | <b>coef</b>  | <b>HR</b>   | <b>HR.95L</b> | <b>HR.95H</b> | <b>p value</b> |
|-----------|--------------|-------------|---------------|---------------|----------------|
| TRNP1     | 0.382912477  | 1.466549668 | 0.954978512   | 2.25216369    | 0.080206219    |
| CCDC112   | 0.650210449  | 1.915943995 | 0.921571858   | 3.98323946    | 0.081641119    |
| CFL1      | 1.885657032  | 6.59068331  | 0.509098487   | 85.32161766   | 0.148951447    |
| CYB5D2    | -1.230989748 | 0.292003425 | 0.09700108    | 0.879021141   | 0.028575575    |
| SLC22A1   | -0.290320823 | 0.748023546 | 0.557853321   | 1.003022129   | 0.052403777    |
